# Supplementary material
Source: publisher figshare collection journal article supplement (https://acs.figshare.com/ndownloader/files/12108107)
Supplement: Supplementary file 1 [file 12108107]

## Supporting Information

### **Organic Nanostructures on Inorganic Ones: An Efficient Electrochromic Display by Design**

Suryakant Mishra<sup>§</sup>, Simran Lambora, Priyanka Yogi, Pankaj R. Sagdeo, and Rajesh Kumar\*

*Material Research Laboratory, Discipline of Physics & MEMS, Indian Institute of Technology Indore,  
Simrol-453552 India.*

*[\\*rajeshkumar@iiti.ac.in](mailto:*rajeshkumar@iiti.ac.in)*

*<sup>§</sup>Current address: Department of Chemical and Biological Physics, Weizmann Institute of Science,  
Rehovot 76100, Israel*

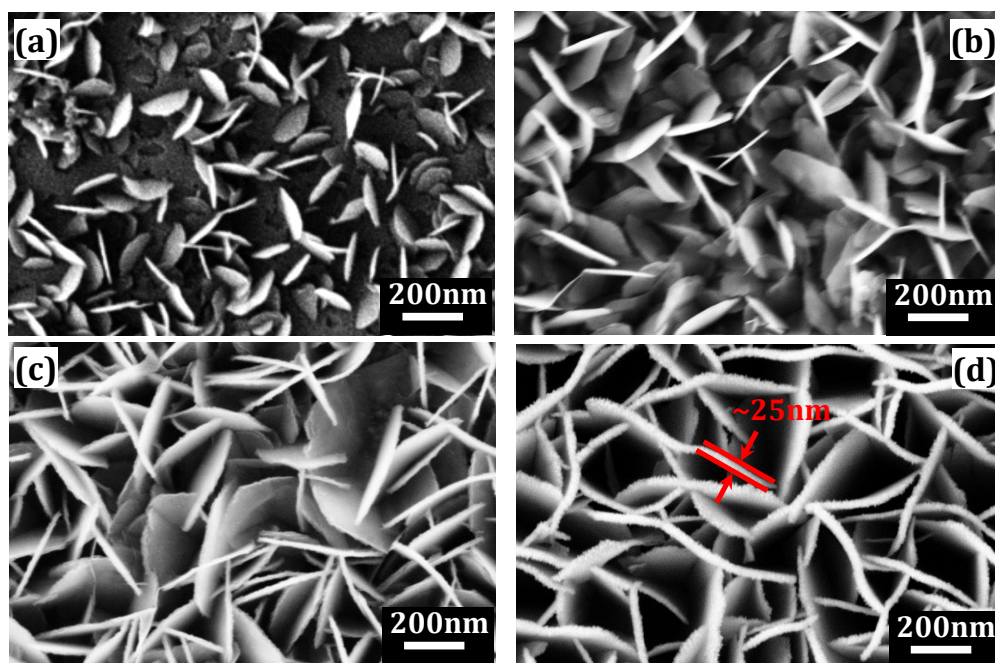

**Figure S1:** Surface morphologies of NiO nanopetals grown by hydrothermal process with deposition time of (a) 2 hrs. (b) 3 hrs. (c) 4 hrs. and (d) 5 hrs.

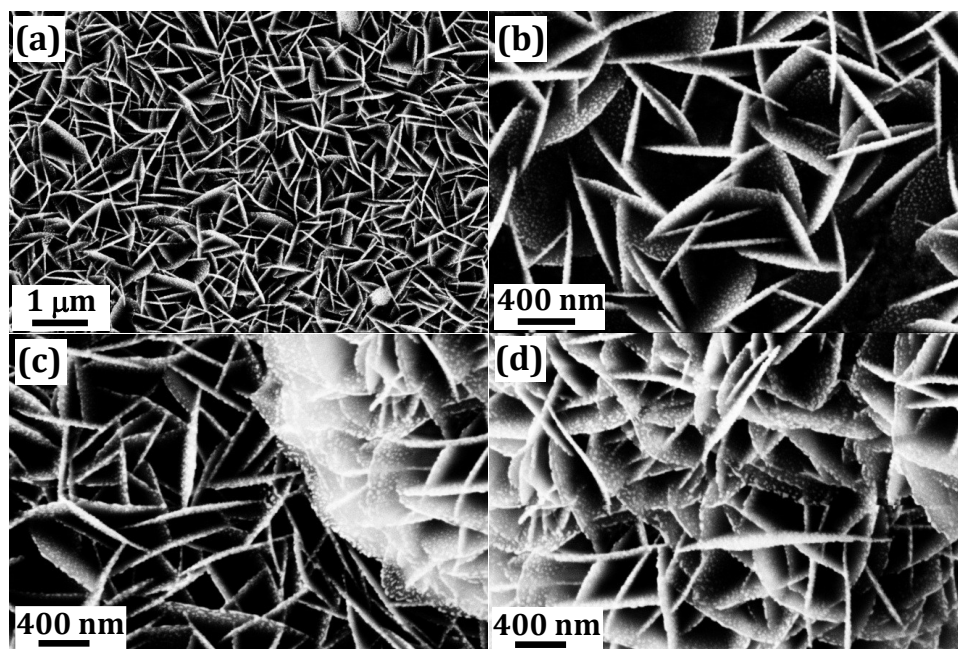

**Figure S2:** (a-d) Surface morphologies of PANI grown on NiO nanopetals during various pulse electrodeposition.

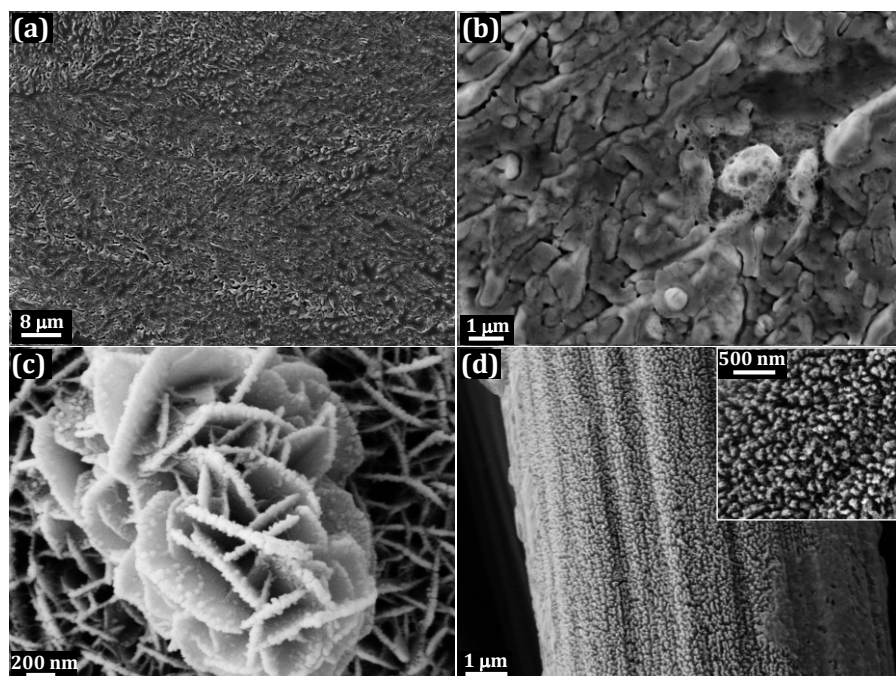

**Figure S3:** SEM images of the PANI film grown on various substrates (a, b) is on the FTO electrode (c) on the NiO nanopetals flower (d) on the carbon fiber.

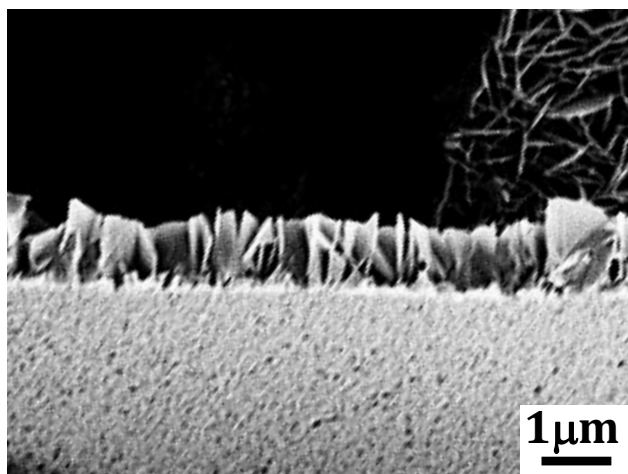

**Figure S4:** Cross-sectional SEM image of NiO-NPs

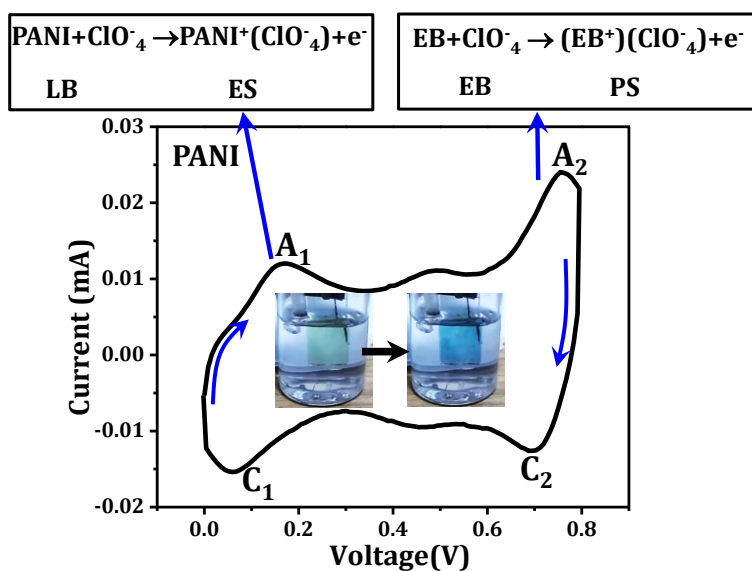

**Figure S5:** Shows reactions during the polymerization of polyaniline.

### Device fabrication

**Step 1:** Clean by ultrasonication FTO electrode of size (2x1 cm<sup>2</sup>) patterned by double-sided tape.

**Step 2:** In this step, hydrothermal method is used to grow NiO-NSs of previous step fabricated electrode.

**Step 3:** Electrode of *step 2* is used for the electro-polymerization of aniline.

**Step 4:** Second layer of double-sided tape is peeled-off from the electrode fabricated in *step 3*.

**Step 5:** Finally second transparent electrode stack on the working electrode made in *step 4*.

**Step 6:** This is final step, which is about the operational state of the device.
